# Supplementary material
Source: HighWire-hosted journal article supplement (doi:10.1101/rna.079960.124)
Supplement: Supplemental_Table_S1.xlsx [file Supplemental_Table_S1.xlsx]

## Sheet: READ ME
Contribution of an alternative 16S rRNA helix to biogenesis of the 30S subunit of the ribosome
Benjamin R. Warner amd Kurt Fredrick
Plasmid List Tab
Plasmid name	Plasmid name
Reference	Reference of plasmid
Description	Description of the plasmid and any mutations
Raw data Fig. 2 Tab
Construct	Description of the strain and any mutations
Mean	Mean of a given construct
Count	Number of replicates for a given construct
SEM	Standard Error of the mean for a given construct
Replicate	raw β-Gal values

## Sheet: plasmid list
Plasmid	Reference	Description
p278MS2	[1]	pBR322 derivative containing the rrnB operon under control of the λ PL promoter.
pDQ207	[2]	pBAD18 containing rrsB, encoding 16S rRNA with ASD 5’-GGGAU-3’
pBW022	[3]	pDQ207 containing marker mutation T1451A
pBW026	This work	pBW022 encoding 16S rRNA with G922A
pBW027	This work	pBW022 encoding 16S rRNA with G922C
pBW028	This work	pBW022 encoding 16S rRNA with G922A and A923G
pBW029	This work	pBW022 encoding 16S rRNA with G922C and A923U
pBW030	This work	pBW022 encoding 16S rRNA with A923G
pBW031	This work	pBW022 encoding 16S rRNA with A923U
pBW032	This work	pBW022 encoding 16S rRNA with A1534U
pBW033	This work	pBW022 encoding 16S rRNA with U1532C and C1533U
pBW035	This work	pBW022 encoding 16S rRNA with U1532A and C1533G
pBW036	This work	pBW022 encoding 16S rRNA with G922A and C1395U
pBW037	This work	pBW022 encoding 16S rRNA with A923G and U1393C
pBW038	This work	pBW022 encoding 16S rRNA with A923U and U1393A
pBW041	This work	pBW022 encoding 16S rRNA with G922A, A923G, U1393C and C1395U
pBW042	This work	pBW022 encoding 16S rRNA with G922C, A923U, U1393A and C1395G
pBW043	This work	pBW022 encoding 16S rRNA with G922C and C1395G
pBW055	This work	pBW022 encoding 16S rRNA with G922A, C1395U and C1533U
pBW056	This work	pBW022 encoding 16S rRNA with G922C, C1395G and C1533G
pBW057	This work	pBW022 encoding 16S rRNA with A923G, U1393C and U1532C
pBW058	This work	pBW022 encoding 16S rRNA with A923U, U1393A and U1532A
pBW059	This work	pBW022 encoding 16S rRNA with G922C, A923U, U1393A, C1395G, U1532A and C1533G
pBW060	This work	pBW022 encoding 16S rRNA with G922A, A923G, U1393C, C1395U, U1532C and C1533U
pBW067	This work	pBW022 encoding 16S rRNA with U1532A
pBW068	This work	pBW022 encoding 16S rRNA with U1532C
pBW069	This work	pBW022 encoding 16S rRNA with C1533G
pBW070	This work	pBW022 encoding 16S rRNA with C1533U
pBW096	This work	p278MS2 encoding 16S rRNA with U1532A and C1533G
pBW097	This work	p278MS2 encoding 16S rRNA with U1532C and C1533U
pBW143	This work	pBW022 encoding 16S rRNA with U1532A, C1533A and A1534U
pBW146	This work	pBW022 encoding 16S rRNA with U1532A, C1533G and A1534U
[1] Youngman E., Brunelle J., Kochaniak A., Green R. (2004) Cell, 117, 589-599
[2] Qin D. and Fredrick K. (2009) Molecular Microbiology, 71, 1239-1249
[3] Warner B., Bundschuh R., and Fredrick K. (2023) Nucleic Acids Research, 50:10, 5242-5254

## Sheet: raw data Fig. 2
β-Galactosidase specific activity
Construct	Mean	Count	SEM	Replicate	Replicate	Replicate	Replicate	Replicate	Replicate	Replicate	Replicate	Replicate	Replicate	Replicate	Replicate	Replicate	Replicate	Replicate	Replicate	Replicate	Replicate	Replicate	Replicate	Replicate	Replicate	Replicate	Replicate	Replicate	Replicate	Replicate	Replicate	Replicate	Replicate	Replicate	Replicate	Replicate	Replicate	Replicate	Replicate	Replicate	Replicate	Replicate	Replicate	Replicate	Replicate	Replicate	Replicate	Replicate	Replicate
WT	4396.25	72	235.107	4703.95	1005.78	5771.69	2022.99	7241.11	7891.6	1770.48	2616.6	3419.64	6980.77	8170.21	4259.41	1395.44	1761.24	3028.35	7215.95	8083.12	2170.52	2473.5	6120.88	2430.7	6833.15	1811.21	2424.43	6408.86	4661.15	5888.16	5912.16	4273.45	3492.12	5123.46	5081.08	4363.64	5563.86	4492.02	4847.82	4555.1	4969.6	4171.76	2203.39	2242.47	3918.37	5861.34	2870.41	5017.61	5732.76
VC	11.4666	68	0.608728	29.6441	19.5431	14.7724	4.44551	10.5061	7.64537	6.624	9.71399	7.67472	18.2137	16.8961	19.0956	8.40866	10.9525	20.8062	22.9475	22.0384	15.7017	21.778	10.8883	7.51183	9.32968	16.8787	7.96606	8.11688	7.03665	7.74769	7.93076	13.147	8.20681	14.3055	15.7228	14.5701	12.5254	13.5977	13.4232	12.1469	9.5352	12.2574	15.1387	7.91656	6.98524	7.09898	10.7811	8.18198	11.8268
U1532C	3263.81	12	375.771	3229.85	1697.87	3791.34	4886.42	1837.49	2035.51	4261.56	2763.19	5265.8	1660.46	5066.14	2670.08
U1532A	2678.05	12	257.623	1903.34	1791.75	4113.96	2652.35	1990.22	2045.09	4151.08	2830.19	1896.55	2019.4	4091.23	2651.45
C1533U	4476.2	12	501.929	4102.39	1866.78	6023.93	2940.13	4508.67	5948.15	6974.32	3232.29	6286.19	1949.64	6445.51	3436.43
C1533G	2102.14	12	316.172	3814.1	1208.92	825.205	2046.71	1253.58	1341.64	814.149	1881.49	3031.27	3078.36	4131.48	1798.74
A1534U	1704.03	8	367.719	1289.56	3253.33	1574.62	750.929	1400.72	3456.63	1611.12	295.341
U1532C / C1533U	3175.15	10	536.78	2607.14	5395.97	5865.23	1033.48	2741.09	1985.48	2187.81	1966.17	5771.29	2197.82
U1532A / C1533G	2199.26	19	207.501	3039.35	1410.42	2309.28	1045.61	2605.81	2256.38	3937.62	3209.68	527.914	1813.38	2563.95	1071.41	2275.03	2243.81	1974.51	3691.29	1289.65	3033.2	1487.6
U1532A / C1533G / A1534U	2100.81	18	267.434	2326.32	1881.87	4486.54	2132.24	1971.26	5120.32	1560.75	1510.33	1756.52	3254.35	1335.71	1367.82	2661.29	2356.78	1015.75	948.864	1046.17	1081.7
U1532A / C1533A / A1534U	3265.33	21	384.452	4304.9	2370.08	5149.19	4888.82	1626.73	5461.27	4716.9	5820.41	2718.86	2152.12	5812.71	5812.5	1605.05	1587.64	1671.47	1582.88	1692.75	1725.84	1313.54	5131.41	1426.88
G922A	18.6661	8	5.30263	4.45826	4.32456	14.4231	30.6588	6.83837	15.3404	21.93	51.355
G922A / C1395U	797.771	12	120.301	333.784	1461.99	565.838	1344.5	1223.67	1267.82	1094.72	447.429	450.951	476.152	467.603	438.801
G922A / C1395U / C1533U	1147.31	12	190.738	2821.65	584.859	1068.91	584.351	851.423	1756.19	1135.48	572.675	877.646	1855.34	1169.83	489.389
G922C	7.18528	4	1.572	6.63661	2.50145	8.45798	11.1451
G922C / C1395G	1419.26	11	239.549	396.154	600.985	1640.04	454.171	2375.38	1176.38	2649.19	506.734	2178.46	1684.21	1950.1
G922C / C1395G / C1533G	267.451	12	63.5259	293.851	745.029	3.64553	182.498	197.389	76.6361	186.825	118.287	308.995	184.893	706.737	204.633
A923G	1974.8	10	385.207	3925.23	4612.97	1682.6	1838.66	1723.64	1009.24	1006.96	945.274	986.562	2016.89
A923G / U1393C	2414.61	17	319.066	855.901	4845.04	1516.79	3380.28	731.606	4633.6	1678.52	3001.27	2184.25	3039.26	791.024	3567.45	3039.77	818.108	3066.14	831.924	3067.45
A923G / U1393C / U1532C	936.613	12	146.145	693.491	1342.16	2282.13	506.426	692.865	1331.17	1152.41	502.15	698.37	543.026	995.556	499.592
A923U	1348.02	10	254.276	903.942	919.469	1294.94	1284.65	1533.25	591.874	590.253	1496.55	1309.48	3555.76
A923U / U1393A	1912.22	12	276.525	288.23	1538.12	529.831	2889.78	2167.43	3410.64	1370.07	2907.76	2029.54	1447.91	1348.48	3018.84
A923U / U1393A / U1532A	1925.82	12	247.757	1133.44	1192.44	2185.63	1085.43	1086.58	2822.32	2314.58	1107.6	1147.06	3251.48	2478.4	3304.93
G922A / A923G	14.0098	7	3.01696	7.85392	7.65973	18.5739	6.33023	7.7095	22.9715	26.9701
G922A / A923G / U1393C / C1395U	1373.94	12	255.509	329.201	1710.05	319.126	1298.53	562.652	2810.51	1042.29	2639.72	602.41	2472.03	701.545	1999.25
G922A / A923G / U1393C / C1395U / U1532C / C1533U	1770.43	8	238.223	2282.54	977.342	1308.49	1199.5	2624.75	1549.94	2882.35	1338.5
G922C / A923U	8.93582	8	2.29282	2.86986	3.98884	9.78434	24.2085	4.86145	4.6548	9.84969	11.2691
G922C / A923U / U1393A / C1395G	214.858	13	41.9103	70.929	393.162	108.799	433.345	75.1813	179.557	270.292	482.524	80.7553	118.441	44.8726	149.054	386.24
G922C / A923U / U1393A / C1395G / U1532A / C1533G	122.359	8	16.4978	90.3995	133.754	137.475	146.463	84.0444	54.8872	219.038	112.808
[truncated: 26 more columns]
